# Supplementary material for: Multi-Omics Analysis in Initiation and Progression of Meningiomas: From Pathogenesis to Diagnosis
Source: Front Oncol. 2020 Aug 28;10:1491. doi: 10.3389/fonc.2020.01491 (PMC7484374; doi:10.3389/fonc.2020.01491)
Supplement: Supplementary Table 1 — Summary of epigenomics studies for meningiomas. [file Table_1.XLSX]

## Sheet: Sheet1
Phenotype	Sample Size (case,control)	Tissue/tissue	Ethnicity	Tested genes/Techniques	Major results	PMID
RAM, healthy irradiated, healthy nonirradiated, irradiated with other cancer and nonirradiated with other cancer	N=120	blood	Israel	PIAS2	part of a model of inherited susceptibility to radiation-associated meningioma	21364586
RAM, healthy irradiated, healthy nonirradiated, irradiated with other cancer and nonirradiated with other cancer	N=120	blood	Israel	KATNAL2	part of a model of inherited susceptibility to radiation-associated meningioma	21364586
RAM, healthy irradiated, healthy nonirradiated, irradiated with other cancer and nonirradiated with other cancer	N=120	blood	Israel	TCEB3C	part of a model of inherited susceptibility to radiation-associated meningioma	21364586
RAM, healthy irradiated, healthy nonirradiated, irradiated with other cancer and nonirradiated with other cancer	N=120	blood	Israel	TCEB3CL	part of a model of inherited susceptibility to radiation-associated meningioma	21364586
RAM, healthy irradiated, healthy nonirradiated, irradiated with other cancer and nonirradiated with other cancer	N=120	blood	Israel	CTNNA3	part of a model of inherited susceptibility to radiation-associated meningioma	21364586
