# Supplementary material for: Multi-Omics Analysis in Initiation and Progression of Meningiomas: From Pathogenesis to Diagnosis
Source: Front Oncol. 2020 Aug 28;10:1491. doi: 10.3389/fonc.2020.01491 (PMC7484374; doi:10.3389/fonc.2020.01491)
Supplement: Supplementary Table 2 — Research on meningiomas in transcriptomics. [file Table_2.XLSX]

## Sheet: Sheet1
Phenotype	Sample Size (case,control)	Tissue/tissue	Ethnicity	Tested genes/Techniques	Major results	PMID
meningiomas	N=50	meningiomas tissue	Turkey	miRNA-21	marker of meningiomas progression	28349893
meningiomas	N=50	meningiomas tissue	Turkey	miRNA-107	marker of meningiomas progression	28349893
meningiomas	N=58	meningiomas tissue		miR-29c-3p	low expression correlates with higher recurrence rates	28327132
meningiomas	N=19	meningiomas tissue		MN1	a prediction index in the classification of meningioma	24289128
meningiomas and normal	N=53	meningioma tissue and non-neoplastic arachnoidal tissue	German	miR-145	a prediction index in the classification of benign and malignant meningioma	23108408
meningiomas	N=25	meningiomas tissue	American	SNORA46	reduce significantly in meningioma progression	31039818
meningiomas	N=25	meningiomas tissue	American	SNORA48	reduce significantly in meningioma progression	31039818
